# Supplementary material for: Review of cobalamin status and disorders of cobalamin metabolism in dogs
Source: PubMed Central journal article supplement (PMC6979111; doi:10.1111/jvim.15638), 2019-11-23
Supplement: JVIM-34-13-s001.pdf [file JVIM-34-13-s001.pdf]

**Supplementary Table 1: Variables determined in dogs of breeds with selective cobalamin malabsorption**

|                                                      | <b>Hypocobalaminemia/<br/>Cobalamin deficiency</b> | <b>Methylmalonic aciduria</b>       | <b>Hyperhomocystein-<br/>emia</b>   |
|------------------------------------------------------|----------------------------------------------------|-------------------------------------|-------------------------------------|
| <b>Border Collie</b>                                 |                                                    |                                     |                                     |
| Morgan et al. <sup>75</sup>                          | <input checked="" type="checkbox"/>                | <input checked="" type="checkbox"/> |                                     |
| Battersby et al. <sup>18</sup>                       | <input checked="" type="checkbox"/>                | <input checked="" type="checkbox"/> |                                     |
| Lutz et al. <sup>76</sup>                            | <input checked="" type="checkbox"/>                | <input checked="" type="checkbox"/> | <input checked="" type="checkbox"/> |
| Fyfe et al. <sup>95</sup>                            | <input checked="" type="checkbox"/>                | <input checked="" type="checkbox"/> |                                     |
| Owczarek-Lipska et al. <sup>77</sup>                 | <input checked="" type="checkbox"/>                | <input checked="" type="checkbox"/> | <input checked="" type="checkbox"/> |
| Fyfe et al. <sup>81</sup>                            | <input checked="" type="checkbox"/>                | <input checked="" type="checkbox"/> |                                     |
| <b>Beagle</b>                                        |                                                    |                                     |                                     |
| Fordyce et al. <sup>17</sup>                         | <input checked="" type="checkbox"/>                | <input checked="" type="checkbox"/> |                                     |
| Kook et al. <sup>83</sup>                            | <input checked="" type="checkbox"/>                | <input checked="" type="checkbox"/> | <input checked="" type="checkbox"/> |
| Kook et al. <sup>59</sup>                            | <input checked="" type="checkbox"/>                | <input checked="" type="checkbox"/> |                                     |
| Kook et al. <sup>47</sup>                            | <input checked="" type="checkbox"/>                | <input checked="" type="checkbox"/> |                                     |
| <b>Chinese Shar-Pei</b>                              |                                                    |                                     |                                     |
| Grützner et al. <sup>79</sup>                        | <input checked="" type="checkbox"/>                |                                     |                                     |
| Bishop et al. <sup>80</sup>                          | <input checked="" type="checkbox"/>                | <input checked="" type="checkbox"/> |                                     |
| Grützner et al. <sup>27</sup>                        | <input checked="" type="checkbox"/>                | <input checked="" type="checkbox"/> | <input checked="" type="checkbox"/> |
| Grützner et al. <sup>93</sup>                        | <input checked="" type="checkbox"/>                |                                     |                                     |
| <b>Australian Shepherd dogs and Giant Schnauzers</b> |                                                    |                                     |                                     |
| He et al. <sup>25</sup>                              | <input checked="" type="checkbox"/>                | <input checked="" type="checkbox"/> |                                     |
| <b>Komondor dogs</b>                                 |                                                    |                                     |                                     |
| Fyfe et al. <sup>94</sup>                            | <input checked="" type="checkbox"/>                | <input checked="" type="checkbox"/> |                                     |

**Supplementary Table 2: Parenteral supplementation of cobalamin in dogs**

|                               |        |         |          |          |          |          |         |
|-------------------------------|--------|---------|----------|----------|----------|----------|---------|
| Body weight                   | <5 kg  | 5–10 kg | 10–20 kg | 20–30 kg | 30–40 kg | 40–50 kg | >50 kg  |
| Recommended dose of cobalamin | 250 µg | 400 µg  | 600 µg   | 800 µg   | 1000 µg  | 1200 µg  | 1500 µg |

(Reference: Texas A&M University Gastrointestinal Laboratory; [www.vetmed.tamu.edu/gilab](http://www.vetmed.tamu.edu/gilab)).

**Supplementary Table 3: Oral supplementation of cobalamin in dogs**

|                   |        |          |         |
|-------------------|--------|----------|---------|
| Weight            | <10 kg | 10–20 kg | >20 kg  |
| Dose of Cobalamin | 250 µg | 500 µg   | 1000 µg |

(Reference: Texas A&M University Gastrointestinal Laboratory; [www.vetmed.tamu.edu/gilab](http://www.vetmed.tamu.edu/gilab)).
